# Supplementary material
Source: PubMed Central journal article supplement (PMC4403654)
Supplement: JB.00040-15_zjb999093590so2.pdf [file JB.00040-15_zjb999093590so2.pdf]

Table A1: Strains and plasmids used in this study

| Strain or plasmid | Genotype/characteristics                                                                              | Source/reference |
|-------------------|-------------------------------------------------------------------------------------------------------|------------------|
| <b>Strains</b>    |                                                                                                       |                  |
| TOP10             | <i>Escherichia coli</i> cloning strain                                                                | Invitrogen       |
| Mm900             | <i>M. maripaludis</i> S2 $\Delta hpt$                                                                 | J.A. Leigh       |
| $\Delta mmp0350$  | <i>M. maripaludis</i> Mm900 $\Delta mmp0350$                                                          | (28)             |
| $\Delta mmp0351$  | <i>M. maripaludis</i> Mm900 $\Delta mmp0351$                                                          | This study       |
| $\Delta mmp0352$  | <i>M. maripaludis</i> Mm900 $\Delta mmp0352$                                                          | This study       |
| $\Delta mmp0353$  | <i>M. maripaludis</i> Mm900 $\Delta mmp0353$                                                          | This study       |
| $\Delta mmp0354$  | <i>M. maripaludis</i> Mm900 $\Delta mmp0354$                                                          | (22)             |
| $\Delta mmp0355$  | <i>M. maripaludis</i> Mm900 $\Delta mmp0355$                                                          | This study       |
| $\Delta mmp0357$  | <i>M. maripaludis</i> Mm900 $\Delta mmp0357$                                                          | This study       |
| $\Delta mmp0358$  | <i>M. maripaludis</i> Mm900 $\Delta mmp0358$                                                          | This study       |
| $\Delta mmp0359$  | <i>M. maripaludis</i> Mm900 $\Delta mmp0359$                                                          | J. Wu            |
| PAO1              | Wild type <i>P. aeruginosa</i> , O5 serotype, CPA+, OSA+                                              | K. Poole         |
| $\Delta wbpA$     | <i>P. aeruginosa</i> PAO1 $\Delta wbpA::Gm$ , CPA+ OSA-                                               | J. Lam           |
| $\Delta wbpI$     | <i>P. aeruginosa</i> PAO1 $\Delta wbpI::Gm$ , CPA+, OSA-                                              | J. Lam           |
| <b>Plasmids</b>   |                                                                                                       |                  |
| pCRPrNeo          | <i>hmv</i> promoter- <i>hpt</i> fusion with Neo <sup>R</sup> cloned into pCR2.1TOPO; Amp <sup>R</sup> | J.A. Leigh       |
| pKJ1057           | In-frame deletion of <i>mmp0351</i> in pCRPrNeo with BamHI                                            | This study       |
| pKJ1059           | In-frame deletion of <i>mmp0352</i> in pCRPrNeo with BamHI                                            | This study       |
| pKJ980            | In-frame deletion of <i>mmp0353</i> in pCRPrNeo with BamHI                                            | This study       |
| pKJ600            | In-frame deletion of <i>mmp0354</i> in pCRPrNeo with BamHI                                            | D.J. VanDyke     |
| pKJ1148           | In-frame deletion of <i>mmp0355</i> in pCRPrNeo with XbaI                                             | This study       |
| pKJ703            | In-frame deletion of <i>mmp0356</i> in pCRPrNeo with BamHI                                            | J. Wu            |
| pKJ978            | In-frame deletion of <i>mmp0357</i> in pCRPrNeo with BamHI                                            | This study       |
| pKJ1182           | In-frame deletion of <i>mmp0358</i> in pCRPrNeo with BamHI                                            | This study       |
| pHW40             | <i>nif</i> promoter- <i>lacZ</i> fusion with Neo <sup>R</sup> cassette; Amp <sup>R</sup>              | J.A. Leigh       |
| pKJ1099           | <i>mmp0351</i> cloned into pHW40 with NsiI/MluI                                                       | This study       |
| pKJ1101           | <i>mmp0352</i> * cloned into pHW40 with NsiI/MluI                                                     | This study       |
| pKJ1161           | <i>mmp0353</i> cloned into pHW40 with NsiI/MluI                                                       | This study       |
| pKJ1021           | <i>mmp0357</i> * cloned into pHW40 with NsiI/MluI                                                     | This study       |
| pWLG40            | <i>hmv</i> promoter- <i>lacZ</i> fusion with Neo <sup>R</sup> cassette; Amp <sup>R</sup>              | J.A. Leigh       |
| pKJ1107           | <i>epdE</i> -FLAG cloned into pWLG40 with NsiI/MluI                                                   | D.B. Nair        |
| pCR2.1-TOPO       | TA-cloning vector; Amp <sup>R</sup> , Kan <sup>R</sup>                                                | Invitrogen       |
| pUCP18            | <i>E. coli</i> – <i>P. aeruginosa</i> shuttle vector, derived from pUC18, Amp <sup>R</sup>            | K. Poole         |
| pKJ1170           | <i>mmp0353</i> ** with His-tag in pUCP18                                                              | This study       |
| pKJ1195           | <i>mmp0353</i> ** in pUCP18                                                                           | This study       |
| pKJ1196           | <i>mmp0357</i> ** with His-tag in pUCP18                                                              | This study       |
| pUCP19            | <i>E. coli</i> – <i>P. aeruginosa</i> shuttle vector, derived from pUC18, Amp <sup>R</sup>            | K. Poole         |
| pKJ1172           | <i>mmp0353</i> ** with His-tag in pUCP19                                                              | This study       |

|         |                                                                                           |            |
|---------|-------------------------------------------------------------------------------------------|------------|
| pKJ1203 | <i>mmp0353</i> ** in pUCP19                                                               | This study |
| pKJ1198 | <i>mmp0357</i> ** with His-tag in pUCP19                                                  | This study |
| pUCP26  | <i>E. coli</i> – <i>P. aeruginosa</i> shuttle vector, derived from pUC18, Tc <sup>R</sup> | J. Lam     |
| pKJ1221 | <i>mmp0353</i> ** in pUCP26                                                               | This study |
| pUCP27  | <i>E. coli</i> – <i>P. aeruginosa</i> shuttle vector, derived from pUC18, Tc <sup>R</sup> | J. Lam     |
| pKJ1222 | <i>mmp0353</i> ** in pUCP27                                                               | This study |

\*gene after SDM to remove internal NsiI sites

\*\* gene synthesized using *P. aeruginosa* codon preferences

Table A2: Primers used to construct in-frame deletions

| Primer  | Sequence (5' to 3')                  | Restriction site<br>(underlined) |
|---------|--------------------------------------|----------------------------------|
| 0351-P1 | TCGGATCCGGATCGGTTGTTACCAAAGACG       | BamHI                            |
| 0351-P2 | TCAGGCGCGCCGAGCTTGTGCAGCATCCTCGAT    | AscI                             |
| 0351-P3 | TATGGCGCGCCCAGTGCATCCTTCTGTATCTTTAG  | AscI                             |
| 0351-P4 | CTAGGATCCTAACCATCTAATCCAGTAACTAACG   | BamHI                            |
| 0352-P1 | TCAGGATCCATAAATGTCAGTTCACCTCTATGG    | BamHI                            |
| 0352-P2 | ATCGGCGCGCCCAACAATACTGACTGCATC       | AscI                             |
| 0352-P3 | GTAGGCGCGCCCAGCCGTTAGTTACTGGATTAG    | AscI                             |
| 0352-P4 | TCAGGATCCTGCCATATAATCATTTAATTCCCTTGC | BamHI                            |
| 0353-P1 | ATGCGGATCCCGTGGAGGTGTTAATTAATG       | BamHI                            |
| 0353-P2 | ATGGCGCGCCATTCGTTTCAATTTTAACTCCTG    | AscI                             |
| 0353-P3 | ATGGCGCGCCAGGGTTATTAAGTTGGAAATT      | AscI                             |
| 0353-P4 | GCATGGATCCCGATTCAACAAATTCATTTCC      | BamHI                            |
| 0355-P1 | GCTCTAGACCGATGTTATAATTAGGGTG         | XbaI                             |
| 0355-P2 | ATGGCGCGCCACTGAGTATATATGTAGCC        | AscI                             |
| 0355-P3 | TAGGCGCGCCAGATCAACTCACATATGGGTGG     | AscI                             |
| 0355-P4 | GCTCTAGATATGGTCGTACTTACTTGG          | XbaI                             |
| 0357-P1 | ATGCGGATCCCAGGATTTGGAGTTTACGATGC     | BamHI                            |
| 0357-P2 | ATGGCGCGCCGCTTGCACCAACGATAGTTAC      | AscI                             |
| 0357-P3 | ATGGCGCGCCCCTGCATCTGAAACATAACAATTA   | AscI                             |
| 0357-P4 | GCATGGATCCATCAGCAACATTCATCCATAGTGG   | BamHI                            |
| 0358-P1 | CGGGATCCTGCATATAATGAAGAATTAACATATCG  | BamHI                            |
| 0358-P2 | TGGCGCGCCATGCATCGTAACTCCAAATCC       | AscI                             |
| 0358-P3 | AGGCGCGCCCAAACCATGACAACAGAAGCTGC     | AscI                             |
| 0358-P4 | GCGGATCCGGAATCATACTACATCTCCGAC       | BamHI                            |

Table A3: Primers used to construct gene complements

| Primer       | Sequence (5' to 3')                                 | Restriction site (underlined) |
|--------------|-----------------------------------------------------|-------------------------------|
| 351_comp-For | CCC <u>ATGCAT</u> GATACCTATTGCAAACC                 | NsiI                          |
| 351_comp-Rev | CCC <u>ACGCGT</u> TAATTAACACCTCCACG                 | MluI                          |
| 352_comp-For | CCC <u>ATGCAT</u> GTTAAAAGTGGCAGTTGTGG              | NsiI                          |
| 352_comp-Rev | GGG <u>ACGCGT</u> TAATTACCGTTAGAGCTTTTCAAAGC        | MluI                          |
| 352_SDM-For* | GGATTAGATGGGTAAATGC <b>G</b> TTAGAAACCGCAATTTATGC   | -                             |
| 352_SDM-Rev* | GCATAAATTGCGGTTTCTA <b>A</b> CGCATTTAACCCATCTAATCC  | -                             |
| 353_comp-For | CCC <u>ATGCAT</u> GAAACGAATTAGGAAATTTAAAAATTGCAG    | NsiI                          |
| 353_comp-Rev | CC <u>ACGCGT</u> TATTTCAAATTTCCAACTTAATAACCCTAAATCC | MluI                          |
| 357_comp-For | CCC <u>ATGCAT</u> GAAAATAGTAACTATCGTTGG             | NsiI                          |
| 357_comp-Rev | CC <u>ACGCGT</u> TCACAAATTCCTCAAACCTTCAAC           | MluI                          |
| 357_SDM-For* | CTTAGAAAATATAATAAATGC <b>C</b> TTTATTGAAAGTAACG     | -                             |
| 357_SDM-Rev* | CGTTACTTTCAATAAA <b>G</b> GCATTTATTATATTTTCTAAG     | -                             |

\*bolded nucleotides were used via SDM to remove internal NsiI restriction sites

Table A4: Primers used to screen and confirm *M. maripaludis* deletion mutants

| Primer       | Sequence (5' to 3')          |
|--------------|------------------------------|
| 0350_seq-For | TTTAAAACGTCACCTTTCTTCG       |
| 0350_seq-Rev | CAATCATTCGCTTTTTAAC          |
| 0351_seq-For | GGACAACGGCTTTAGACGTCGC       |
| 0351_seq-Rev | CGATCCTTATTCATATCTGAAAGCC    |
| 0352_seq-For | CCAGTGCATCCTTCTGTATCTTTAGATG |
| 0352_seq-Rev | CCAATTACGTTAATTCCGTATTCAGC   |
| 0353_seq-For | CGATGACGACAAGAATCGCA         |
| 0353_seq-Rev | TATACGCCACAAATGCAGTG         |
| 0354_seq-For | ATTTAAACACTTGGACTTTG         |
| 0354_seq-Rev | TTTAGGACCGTTATTGAAC          |
| 0355_seq-For | CGATATTTAGTTGATATTCATGATTCC  |
| 0355_seq-Rev | GGTATTGTCCCAACCGACAATGC      |
| 0356_seq-For | TCTCCTGTCGGATACCTAG          |
| 0356_seq-Rev | GGTTCCTGTTGTAGTTATGG         |
| 0357_seq-For | GAGCAACTTCATAGAGCTTG         |
| 0357_seq-Rev | GGCTTGAAGTATACTGTTGG         |
| 0358_seq-For | CCACAGTATATGCCAAACCATCTG     |
| 0358_seq-Rev | CCATACCATAAATGACGTACTATCG    |
| 0359_seq-For | CACTATTGCAATACTGAGTCC        |
| 0359_seq-Rev | CAATACATCTGAAGGTAGTG         |

Table A5: Primers used for RT-PCR

| Primer         | Sequence (5' to 3')           |
|----------------|-------------------------------|
| 350-351_RT-For | GCAATGATCGGATCCGGATCGG        |
| 350-351_RT-Rev | CGACGTCTAAAGCCGTTGTCC         |
| 351-352_RT-For | CGGGTATTCATTATCCAATTCGG       |
| 351-352_RT-Rev | CGTTGGAACAACAATACTGACTGC      |
| 352-353_RT-For | GGTACGAAAGGAATTGCTTATCTGG     |
| 352-353_RT-Rev | CCACCATTTGGTTGATATCCACG       |
| 353-354_RT-For | CCATTATGTGACGAATTAGATGC       |
| 353-354_RT-Rev | CCGCAATATACGCCACAAATGC        |
| 355-356_RT-For | CCACTATGGATGAATGTTGCTG        |
| 355-356_RT-Rev | GGTCATTAGACATTTGATATGC        |
| 356-357_RT-For | GGATGGGTGGAATATATTGGTTGG      |
| 356-357_RT-Rev | CCATCGGGCTTGAAGTATACTGTTGG    |
| 357-358_RT-For | CGATAGTACGTCAATTTATGGTATGGTTC |
| 357-358_RT-Rev | CCTGCAAGGGCTCCTGCAATCG        |
| 358-359_RT-For | GGAAGCTGATCTAGTAATTGGTTC      |
| 358-359_RT-Rev | GTAGCTCGCAATACATCTGAAGG       |
| PA353_RT-For   | CGAGCTGGTGAGCAAGAACGTGG       |
| PA353_RT-Rev   | GGCCCTTGATGGTCAGCTCCACG       |
